# Supplementary material for: Management and Outcome of Patients With Acute Coronary Syndrome Caused by Plaque Rupture Versus Plaque Erosion: An Intravascular Optical Coherence Tomography Study
Source: PubMed Central journal article supplement — J Am Heart Assoc. 2017 Feb 24;6(3):e004730. doi: 10.1161/JAHA.116.004730 (PMC5524007; doi:10.1161/jaha.116.004730), 2017-02-24
Supplement: JAH3-6-e004730-s001.pdf [file JAH3-6-e004730-s001.pdf]

# **SUPPLEMENTAL MATERIAL**

**Table S1. Clinical outcomes of patients with stent implantation and without stent implantation stratified by treatment strategy**

|                          | PR        |         |      | OCT-erosion |         |      |
|--------------------------|-----------|---------|------|-------------|---------|------|
|                          | Non-stent | Stent   | p    | Non-stent   | Stent   | p    |
| <b>Death</b>             | 1(50)     | 0(0)    | 1.0  | 0(0)        | 1(2.0)  | 0.76 |
| <b>Acute MI or ACS</b>   | 0(0)      | 1(1.4)  | 0.94 | 0(0)        | 2(4.0)  | 0.66 |
| <b>Revascularization</b> | 0(0)      | 9(12.9) | 0.72 | 0(0)        | 4(8.0)  | 0.54 |
| TLR                      | 0(0)      | 5(7.1)  | 0.79 | 0(0)        | 1(2.0)  | 0.76 |
| Non-TLR                  | 0(0)      | 4(5.7)  | 0.82 | 0(0)        | 3(6.0)  | 0.59 |
| <b>Any events</b>        | 1(50)     | 9(12.9) | 0.21 | 0(0)        | 7(14.0) | 0.41 |

Data are presented as n (%). MI = myocardial infarction; ACS = acute coronary

syndrome; TVR = target vessel revascularization; TLR = target lesions

revascularization.
